# Supplementary material for: Controlling the size of Pt nanoparticles with a cationic surfactant, CnTABr
Source: Royal Society of Chemistry journal article supplement (doi:10.1039/c7ce02235b), 2018-01-01
Supplement: c7ce02235b1.pdf [file c7ce02235b1.pdf]

### Electronic supplementary information

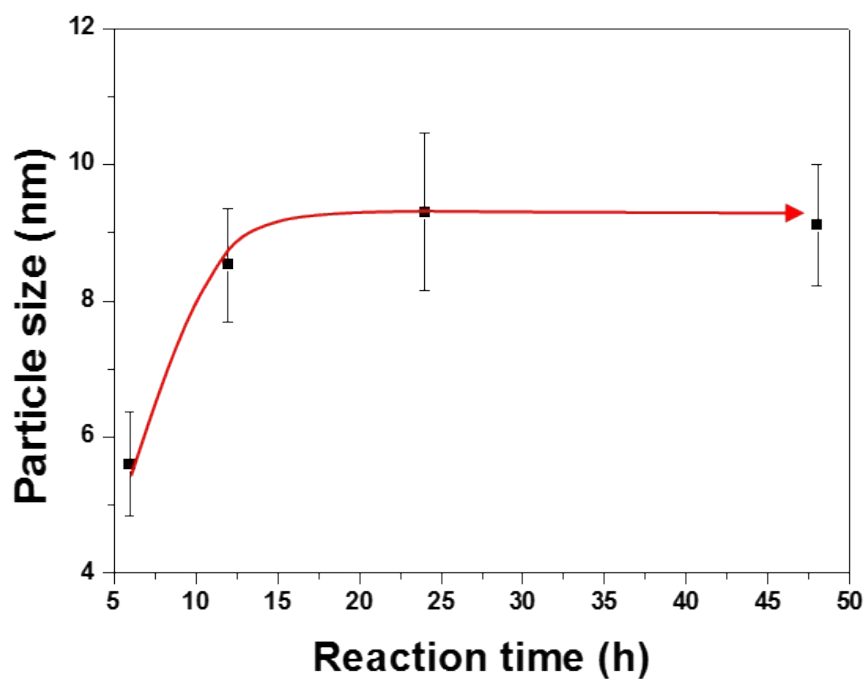

**Fig. S1** Average size of the Pt nanoparticles prepared with 0.18 M  $C_{16}TABr$  and various reaction time. The error bars were obtained by analyzing 100 particles for each sample.

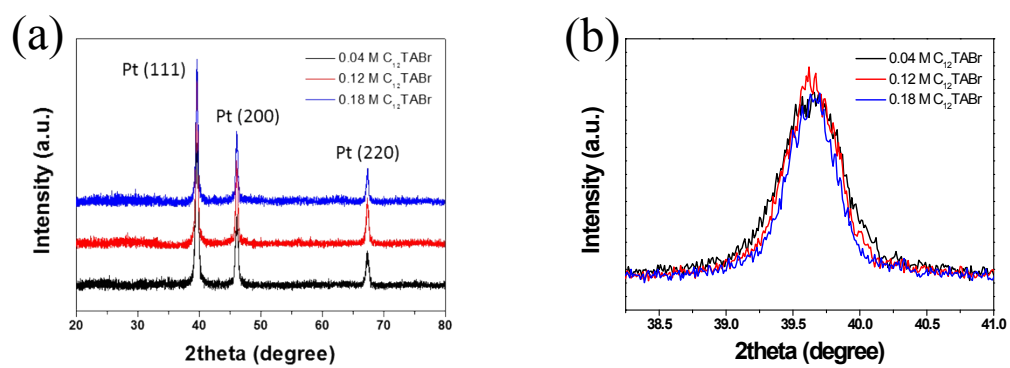

**Fig. S2** XRD data of (a) Pt nanoparticles prepared with various concentrations of C<sub>12</sub>TABr for 24 h and (b) magnification of (111) peak.

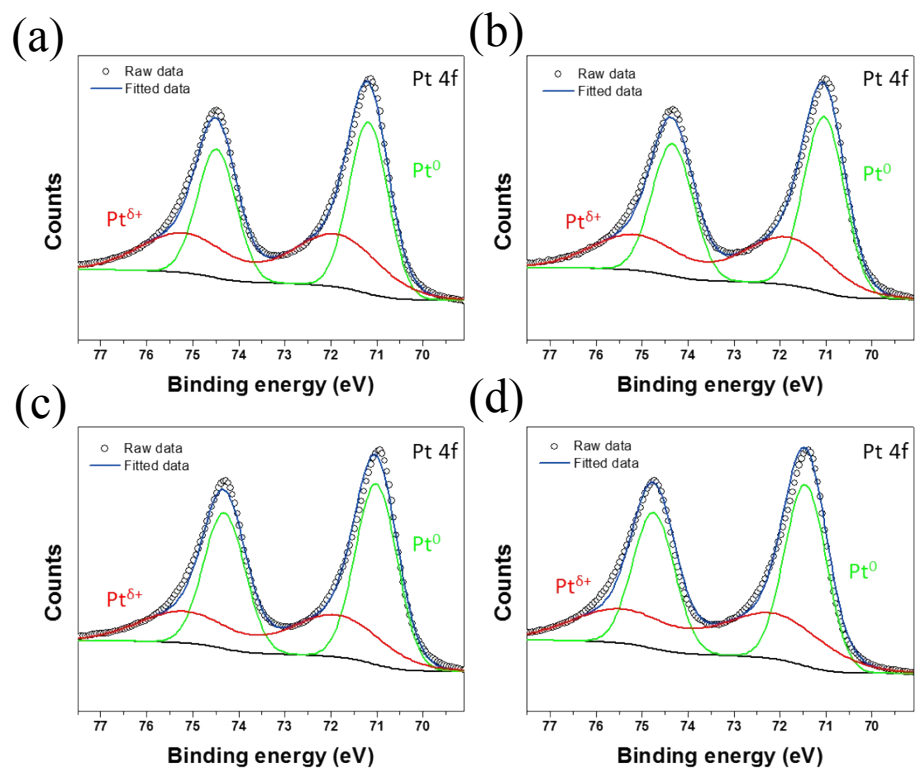

**Fig. S3** High resolution XPS spectrum of the Pt 4f state of the Pt nanoparticles prepared with 0.12 M (a) C<sub>12</sub>TABr, (b) C<sub>14</sub>TABr, (c) C<sub>16</sub>TABr and (d) C<sub>18</sub>TABr for 24 h.

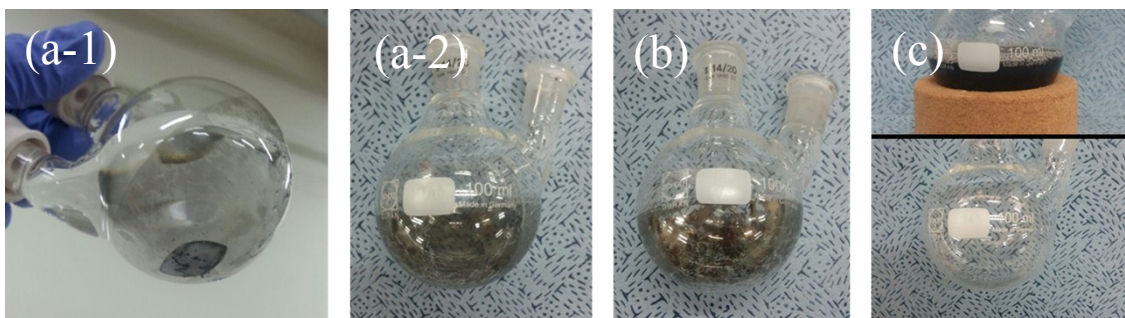

**Fig. S4** Photographs of a flask after the Pt nanoparticle synthesis with (a-1&2) 0.005 M  $C_{12}TABr$ , (b) 0.008 M  $C_{12}TABr$ , and (c) 0.12 M of  $C_{12}TABr$ .

Table S1. Calculated size of the Pt nanoparticles prepared with C<sub>12</sub>TABr by Scherrer equation from (111) peak in XRD patterns and TEM analysis.

|                                      | <b>0.04 M</b> | <b>0.12 M</b> | <b>0.18 M</b> |
|--------------------------------------|---------------|---------------|---------------|
| Particle size<br>(Scherrer equation) | 16.1 nm       | 19.2 nm       | 21.2 nm       |
| Particle size<br>(TEM analysis)      | 18.8 nm       | 21.8 nm       | 24.5 nm       |

**Table S2.** Critical micelle concentration (CMC) values of each surfactant.

|                 | <b>C<sub>10</sub>TABr</b>               | <b>C<sub>12</sub>TABr</b>               | <b>C<sub>14</sub>TABr</b> | <b>C<sub>16</sub>TABr</b>              | <b>C<sub>18</sub>TABr</b> |
|-----------------|-----------------------------------------|-----------------------------------------|---------------------------|----------------------------------------|---------------------------|
| <b>CMC (mM)</b> | 65.6 <sup>19</sup> , 66.9 <sup>20</sup> | 15.7 <sup>20</sup> , 14.4 <sup>22</sup> | 3.94 <sup>19,20</sup>     | 0.92 <sup>20</sup> , 0.9 <sup>21</sup> | 0.35 <sup>23</sup>        |
